# Supplementary material for: A correlative and quantitative imaging approach enabling characterization of primary cell-cell communication: Case of human CD4+ T cell-macrophage immunological synapses
Source: PubMed Central journal article supplement (PMC5964238; doi:10.1038/s41598-018-26172-3), 2018-05-22
Supplement: 41598_2018_26172_MOESM6_ESM.pdf [file 41598_2018_26172_MOESM6_ESM.pdf]

***A correlative and quantitative imaging approach enabling characterization of primary cell-cell communication: Case of human CD4<sup>+</sup> T cell-macrophage immunological synapses.***

Richard Kasproicz, Emma Rand, Peter J O'Toole and Nathalie Signoret

**Supplementary information**

## Supplemental Methods:

### Epifluorescence for live calcium imaging:

Live imaging was performed on a Nikon Eclipse TE200 wide-field inverted fluorescence microscope (Nikon Instruments) equipped with a Plan Fluor 10X/0.3 NA objective, mercury lamp, an automated filter-wheel controller (OptiScan™ II; Prior Scientific), a custom-built 37°C incubator box, and SimplePCI software (Hamamatsu Corporation). The focal plane was set to the position of the adherent MDMs and imaging was initiated immediately after fura-2-loaded CD4<sup>+</sup> T cells had been introduced into the imaging chamber at a rate of ~33 µl/s using a custom-designed syringe pump. The sample was excited via 340 nm, 380 nm and 485/20 nm filters at 10 s intervals for a total duration of 20 min. Images were captured via a FITC 510-560 band-pass emission filter using a Rolera-XR Fast 1294 camera (Q-Imaging).

### Confocal microscopy:

We used a Zeiss LSM710 confocal fluorescence microscope with ZEN 2009 software and a Plan-Apochromat 63x/1.4 NA Oil objective. The X, Y pixel resolution of each defined region and the Z step size was optimized to achieve Nyquist sampling. Images of DAPI, AlexaFluor-488 and AlexaFluor-647 fluorophores were acquired sequentially using a diode laser (405nm) 30mW, Ar ion laser (488nm) 30mW and HeNe-laser (633nm) 5mW. Gain (detector sensitivity) was adjusted so as not to saturate pixels within the 8-bit dynamic range of the image whilst giving no detectable signal in isotype-matched controls. Spectral detector emission ranges were set at 410-585nm, 490-626nm, and 638-755nm for the aforementioned illumination sources, respectively.

### Multivariate analysis:

Table of calcium and motility measures from all samples are available as supplemental dataset (**FullCalciumTable.csv** file). Details of scripts used for PCA and LDA in MATLAB and R, respectively are provided bellow:

#### **PCA analysis on calcium & Motility measures in MATLAB:**

```
%uses the 'fullSubtypes' file without the header as subtypes

%uses the 'fullCalciumTable' file without the header as calciumTable
%(header as calciumTableHeader)

%THEN RUN PCA (the data has already been z-scored)
%[coeff,score,latent,tsquared,explained,mu] = pca(calciumSignatures);

%these output variables relate to tables of the same name (e.g. score.csv)

%*****
%scree plot
figure()
pareto(explained)
title('All Donors')
xlabel('Principal Component')
ylabel('Variance Explained (%)')
%*****
%Visualize both the orthonormal principal component coefficients for each
%variable and the principal component scores for each observation in a single plot.

figure('Color','w');
set(0,'defaultFontSize',11,'defaultTextFontWeight','bold')
hbi = biplot(coeff(:,1:3), ...
    'Scores', score(:,1:3), ...
    'VarLabels', calciumTableHeader, ...
    'ObsLabels', num2str(subtypes), ...
    'markersize', 5, 'LineWidth', 4);
title('Bi-Plot: All Donors', 'FontSize', 24);
```

```

xlabel(['PC1-' num2str(round(explained(1))) '%'], 'FontSize', 18);
ylabel(['PC2-' num2str(round(explained(2))) '%'], 'FontSize', 18);
zlabel(['PC3-' num2str(round(explained(3))) '%'], 'FontSize', 18);
pbaspect([1 1 1]);
box on;
set(gca,'XLim',[-0.27 0.6],'YLim',[-0.27 0.6],'ZLim',[-0.45 0.65])

% Manipulate plot colors
for ii = 1:length(hbi)-length(subtypes)
    set(hbi(ii), 'Color', [0.2 0.2 0.2], 'Visible', 'on');
end
for ii = length(hbi)-length(subtypes):length(hbi)
    userdata = get(hbi(ii), 'UserData');
    if ~isempty(userdata)
        if subtypes(userdata) == 0
            set(hbi(ii), 'MarkerFaceColor', 'none', 'MarkerEdgeColor', [0 0.69 0.94], 'Marker', 'o', 'LineWidth', 0.001, 'Visible', 'on');
        elseif subtypes(userdata) == 1
            set(hbi(ii), 'MarkerFaceColor', 'none', 'MarkerEdgeColor', [1 0.31 0.31], 'Marker', 'o', 'LineWidth', 0.001, 'Visible', 'on');
        elseif subtypes(userdata) == 2
            set(hbi(ii), 'MarkerFaceColor', 'none', 'MarkerEdgeColor', [0.57 0.82 0.31], 'Marker', 'o', 'LineWidth', 0.001, 'Visible', 'on');
        elseif subtypes(userdata) == 3
            set(hbi(ii), 'MarkerFaceColor', 'none', 'MarkerEdgeColor', [0.44 0.19 0.63], 'Marker', 'o', 'LineWidth', 0.001, 'Visible', 'on');
        elseif subtypes(userdata) == 4
            set(hbi(ii), 'MarkerFaceColor', 'none', 'MarkerEdgeColor', [0 0.69 0.94], 'MarkerEdgeColor', [0 0.69 0.94], 'Marker', 'o', 'LineWidth', 0.001, 'Visible', 'on');
        elseif subtypes(userdata) == 5
            set(hbi(ii), 'MarkerFaceColor', [1 0.31 0.31], 'MarkerEdgeColor', [1 0.31 0.31], 'Marker', 'o', 'LineWidth', 0.001, 'Visible', 'on');
        elseif subtypes(userdata) == 6
            set(hbi(ii), 'MarkerFaceColor', [0.57 0.82 0.31], 'MarkerEdgeColor', [0.57 0.82 0.31], 'Marker', 'o', 'LineWidth', 0.001, 'Visible',
'on');
        elseif subtypes(userdata) == 7
            set(hbi(ii), 'MarkerFaceColor', [0.44 0.19 0.63], 'MarkerEdgeColor', [0.44 0.19 0.63], 'Marker', 'o', 'LineWidth', 0.001, 'Visible',
'on');
        end
    else
        set(hbi(ii), 'Color', 'k', 'Visible', 'off');
    end
end
end

view([0 0 90]) % PC1 vs PC2
%view([90 0 0]) % PC2 vs PC3
%view([0 -90 0]) % PC1 vs PC3

```

## Subtyping cells on calcium profile using R:

```

# The data in FullCalciumTable.csv are from an investigation of
# calcium profiles for cell subtypes

# The data are organised
# 'data.frame': 1391 obs. of 13 variables:
# $ Track.duration : int 770 870 880 850 790 780 660 510 590 360 ...
# $ Min.340.380 : num 0.167 0.286 0.273 0.357 0.333 ...
# $ Max.340.380 : num 0.438 0.6 0.455 0.5 0.467 ...
# $ t_Max.340.380. : int 1030 1150 610 970 1050 710 580 990 1120 1150 ...
# $ X.track.length_Max.340.380.: num 79.2 95.4 34.1 74.1 82.3 ...
# $ Median.340.380 : num 0.368 0.429 0.391 0.417 0.389 ...
# $ Length_ratio. : num 4.72 19.5 1.05 1.95 4.29 ...
# $ Euclidean_ratio. : num -8.89 -2.55 631.65 -1.42 13.03 ...
# $ MI_ratio. : num 1.884 0.131 603.19 0.733 3.036 ...
# $ Speed_ratio. : num 0.786 0.855 1.03 0.466 0.619 ...
# $ AUC_340.380. : num 0.00574 0.05259 0.01649 0.02941 0.01292 ...
# $ Baseline.returns : num 0 0.01609 0 0.00471 0.00127 ...
# $ Mobile.fraction : num 0.61 0.494 0.455 0.447 0.608 ...

# the cell type labels are in FullSubtypes.csv
# celltype labels, numeric code 0,1,2,4,5,6,7 note no type 3

#####
# Set up #
#####

# working directory (in my case, yours will differ)
setwd("~/rhelp")

# packages
library(ggplot2)
# H. Wickham. ggplot2: Elegant Graphics for Data Analysis.
# Springer-Verlag New York, 2009.

```

```

library(ggbiplot)
# Vincent Q. Vu (2011). ggbiplot: A ggplot2 based biplot. R package
# version 0.55.
# http://github.com/vqv/ggbiplot

library(MASS)
# Venables, W. N. & Ripley, B. D. (2002) Modern Applied Statistics
# with S. Fourth Edition. Springer, New York. ISBN 0-387-95457-0

# palette
palette <- c("deepskyblue", "red", "chartreuse3", "darkorchid4")

#####
# Import and tidy data #
#####

# celltype labels, numeric code 0,1,2,4,5,6,7 note no type 3
fullsubtypes <- read.csv("FullSubtypes.csv")

# explore
str(fullsubtypes)
table(fullsubtypes$subtypes)

# make subtype a factor
fullsubtypes$subtypes <- factor(fullsubtypes$subtypes)

# add a factor for subtypes where 0 and 4 are flat,
# 1 and 5 are transient, 2 and 6 and low and 7 is high
fullsubtypes$subtypes2[fullsubtypes$subtypes == "0"] <- "flat"
fullsubtypes$subtypes2[fullsubtypes$subtypes == "4"] <- "flat"

fullsubtypes$subtypes2[fullsubtypes$subtypes == "1"] <- "transient"
fullsubtypes$subtypes2[fullsubtypes$subtypes == "5"] <- "transient"

fullsubtypes$subtypes2[fullsubtypes$subtypes == "2"] <- "low"
fullsubtypes$subtypes2[fullsubtypes$subtypes == "6"] <- "low"

fullsubtypes$subtypes2[fullsubtypes$subtypes == "7"] <- "high"

fullsubtypes$subtypes2 <- factor(fullsubtypes$subtypes2,
  levels = c("flat", "transient", "low", "high"))
levels(fullsubtypes$subtypes2)

# import measured variables
fullcalciumtable <- read.csv("FullCalciumTable.csv")

# boxplot of measurements to assess whether scaling is needed
# and indicate potential outliers

boxplot(fullcalciumtable)
# scaling is required
# euclidean ration and mi ration look to have extreme outliers

#####
# Explore scaled with PCA - outliers included #
#####

# PCA
pca <- prcomp(fullcalciumtable, scale. = TRUE)
summary(pca)
# do seem to need 9 components to capture 95% of the variation
# PC1 = 25.4%, PC2 = 17.2%, PC3 = 13.6%, cummulative in 3 is 56%

# dataframe of PCA scores with subtype labels (4 categories)
pca_labelled <- data.frame(pca$x, subtypes = fullsubtypes$subtypes2)
# PC1 and PC2
ggplot(data = pca_labelled, aes(x = PC1, y = PC2, color = subtypes)) +
  geom_point()
# PC1 and PC3
ggplot(data = pca_labelled, aes(x = PC1, y = PC3, color = subtypes)) +
  geom_point()
# PC2 and PC3
ggplot(data = pca_labelled, aes(x = PC2, y = PC3, color = subtypes)) +
  geom_point()

# A fancier biplot
# PC1 and PC2
pcabiplot <- ggbiplot(pca, choices = c(1, 2), groups = pca_labelled$subtypes,
  ellipse = TRUE,

```

```

    ellipse.prob = 0.95,
    varname.size = 4,
    varname.adjust = 2.5) +
  scale_colour_manual(values = palette, name = "Classification") +
  theme(panel.background = element_rect(fill = "white", color = "black"))+
  theme(axis.line.x = element_line(color = "black"),
        axis.line.y = element_line(color = "black")) +
  theme(legend.key=element_blank())

# send image to file
png(filename = "pcabiplot.png", width = 500, height = 500)
plot(pcabiplot)
dev.off()

#####
# Linear discriminant analysis (LDA) - outliers included      #
#####

# perform LDA
ldaout <- lda(fullcalciumtable, fullsubtypes$subtypes2)

# To determine how well the subtypes are predicted
# Note: testing and training on 100% data

#
pldaout <- predict(object = ldaout,
                  newdata = fullcalciumtable)

# how many predicted classes are the same as the actual
# classes, over all
overallcorrect <- table(pldaout$class == fullsubtypes$subtypes2)
overallcorrect[2]/sum(overallcorrect)*100
# FALSE TRUE
# 214 1177
# 84.6% are correctly predicted

# correct per class
perclasscorrect <- table(predicted = pldaout$class,
                        actual = fullsubtypes$subtypes2)
#      actual
# predicted flat transient low high
# flat      924 132 15  0
# transient  2 134 33  0
# low        1 24 78  1
# high       0  1  5 41

# % each class correctly predicted
flatcorrect <- round(perclasscorrect[1, 1] /
                    sum(perclasscorrect[,1]) * 100, 1)
transientcorrect <- round(perclasscorrect[2, 2] /
                        sum(perclasscorrect[,2]) * 100, 1)
lowcorrect <- round(perclasscorrect[3, 3] /
                   sum(perclasscorrect[,3]) * 100, 1)
highcorrect <- round(perclasscorrect[4, 4] /
                    sum(perclasscorrect[,4]) * 100, 1)
# flatcorrect 99.7
# transientcorrect 46
# lowcorrect 59.5
# highcorrect 97.6

# we add the labels of the original and class prediction
ldaout_labelled <- data.frame(pldaout$x,
                             subtypes = fullsubtypes$subtypes2,
                             pldaout$class)

# add a variable which indicates if predictions were correct
indic <- pldaout$class == fullsubtypes$subtypes2
ldaout_labelled <- data.frame(ldaout_labelled, correct = indic)

# biplot with LD 1 and 2
ldabiplot <- ggbiplot(ldaout, choices = c(1, 2),
                    groups = ldaout_labelled$subtypes,
                    ellipse = TRUE,
                    ellipse.prob = 0.95,
                    varname.size = 4,
                    varname.adjust = 2) +
  xlab("LD1") +
  ylab("LD2")+
  xlim(-5, 20) +
  scale_colour_manual(values = palette, name = "Classification") +
  theme(panel.background = element_rect(fill = "white", color = "black"))+

```

```

theme(axis.line.x = element_line(color = "black"),
      axis.line.y = element_line(color = "black")) +
theme(legend.key=element_blank())
# send image to file
png(filename = "ldabiplot.png", width = 500, height = 500)
plot(ldabiplot)
dev.off()

# figure with correctly (TRUE and incorrectly predicted classes)
pc <- c(flatcorrect, transientcorrect, lowcorrect, highcorrect)
pc <- paste0(pc, "%")
dat_text <- data.frame(label = c(NA, NA, NA, NA,
                                pc),
                      pldaout.class = levels(ldaout_labelled$subtypes),
                      correct = rep(c(FALSE, TRUE), each = 4))
classplot <- ggplot() +
geom_point(data = ldaout_labelled, aes(x = LD1, y = LD2, color = subtypes), size = 2) +
facet_grid(correct ~ pldaout.class) +
scale_colour_manual(values = palette, name = "Classification") +
theme(panel.background = element_rect(fill = "white", color = "black"),
      strip.background = element_rect(fill = "white", color = "black")) +
theme(axis.line.x = element_line(color = "black"),
      axis.line.y = element_line(color = "black")) +
geom_text(data = dat_text, aes(x = 2, y = -6, label = label)) +
theme(legend.key=element_blank())

# send image to file
png(filename = "classplot.png", width = 800, height = 400)
plot(classplot)
dev.off()

#####
# Linear discriminant analysis (LDA) - outliers excluded #
#####

# exclude outliers
boxplot(fullcalciumtable2)
# decide to exclude those above 2000
fullcalciumtable2 <- fullcalciumtable[fullcalciumtable$Euclidean_ratio. < 2000,]
fullcalciumtable2 <- fullcalciumtable2[fullcalciumtable2$MI_ratio. < 2000,]
fullcalciumtable2 <- fullcalciumtable2[complete.cases(fullcalciumtable2),]

# exclude the rows with those labels from the subtypes column too
fullsubtypes2 <- fullsubtypes[fullcalciumtable$Euclidean_ratio. < 2000,]
fullsubtypes2 <- fullsubtypes2[fullcalciumtable2$MI_ratio. < 2000,]
fullsubtypes2 <- fullsubtypes2[complete.cases(fullsubtypes2),]

# perform LDA
ldaout2 <- lda(fullcalciumtable2, fullsubtypes2$subtypes2)

# To determine how well the subtypes are predicted
# Note: testing and training on 100% data

#
pldaout2 <- predict(object = ldaout2,
                  newdata = fullcalciumtable2)
levels(pldaout2$class)
# how many predicted classes are the same as the actual
# classes, over all
overallcorrect2 <- table(pldaout2$class == fullsubtypes2$subtypes2)
overallcorrect2[2]/sum(overallcorrect2)*100
# FALSE TRUE
# 208 1180
# 85% are correctly predicted, very slightly better

# correct per class
perclasscorrect2 <- table(predicted = pldaout2$class,
                        actual = fullsubtypes2$subtypes2)
#      actual
# predicted flat transient low high
# flat      924  129  15  0
# transient   2  137  32  0
# low         0   24  79  1
# high        0   0  5  40

# % each class correctly predicted
flatcorrect2 <- round(perclasscorrect2[1, 1] /
                    sum(perclasscorrect2[, 1]) * 100, 1)
transientcorrect2 <- round(perclasscorrect2[2, 2] /
                          sum(perclasscorrect2[, 2]) * 100, 1)
lowcorrect2 <- round(perclasscorrect2[3, 3] /
                    sum(perclasscorrect2[, 3]) * 100, 1)

```

```

highcorrect2 <- round(perclasscorrect2[4, 4] /
  sum(perclasscorrect2[,4]) * 100, 1)

# we add the labels of the original and class prediction
ldaout2_labelled <- data.frame(pldaout2$x,
  subtypes = fullsubtypes2$subtypes2,
  pldaout2$class)

# add a variable which indicates if predictions were correct
indic2 <- pldaout2$class == fullsubtypes2$subtypes2
ldaout2_labelled <- data.frame(ldaout2_labelled, correct = indic2)

# biplot with LD 1 and 2
ldabiplot2 <- ggbiplot(ldaout2, choices = c(1, 2),
  groups = ldaout2_labelled$subtypes,
  ellipse = TRUE,
  ellipse.prob = 0.95) +
  xlab("LD1") +
  ylab("LD2")+
  scale_colour_manual(values = palette, name = "Classification") +
  theme(panel.background = element_rect(fill = "white"))+
  theme(axis.line.x = element_line(color = "black"),
  axis.line.y = element_line(color = "black")) +
  theme(legend.key=element_blank())
# send image to file
png(filename = "ldabiplot2.png", width = 500, height = 500)
plot(ldabiplot2)
dev.off()

# figure with correctly (TRUE) and incorrectly predicted classes)
pc2 <- c(flatcorrect2, transientcorrect2, lowcorrect2, highcorrect2)
pc2 <- paste0(pc2, "%")
dat_text2 <- data.frame(label = c(NA, NA, NA, NA,
  pc),
  pldaout2.class = levels(ldaout2_labelled$subtypes),
  correct = rep(c(FALSE, TRUE), each = 4))
classplot2 <- ggplot() +
  geom_point(data = ldaout2_labelled, aes(x = LD1, y= LD2, color = subtypes), size = 2) +
  facet_grid(correct~pldaout2.class) +
  scale_colour_manual(values = palette, name = "Classification") +
  theme(panel.background = element_rect(fill = "white", color = "black"),
  strip.background =element_rect(fill = "white", color = "black"))+
  theme(axis.line.x = element_line(color = "black"),
  axis.line.y = element_line(color = "black")) +
  geom_text(data = dat_text2, aes(x = 1, y = -6, label = label)) +
  theme(legend.key=element_blank())

# send image to file
png(filename = "classplot2.png", width = 800, height = 400)
plot(classplot2)
dev.off()

# conclusion: removing outliers doesn't really have an effect

```

## Supplemental figures and legends:

**Fig. S1: Comparing calcium signals of T cells perfused on MDMs  $\pm$  SEE.** Disparate responses of cells isolated from two different donors were found during statistical comparison of the distributions of max 340:380 ratio values between T cells with unpulsed or SEE-pulsed autologous MDMs. A donor variability related to the detection of all signaling T cells in mixed cells populations for a low frequency of conjugates formed (8%), as indicated by the flow cytometry experiment.

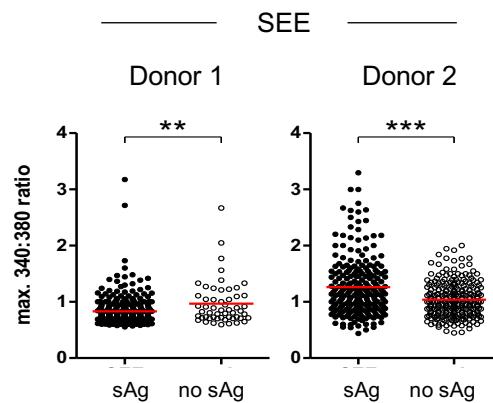

**Fig. S2: Motility parameters in absence of sAgs:** Each point represents an individual cell measured from donor ( $n=3$ ) samples in absence of sAgs [Mean,  $x$ ; Bars: median  $\pm$  interquartile range. Statistical analysis: Mann Whitney U test].

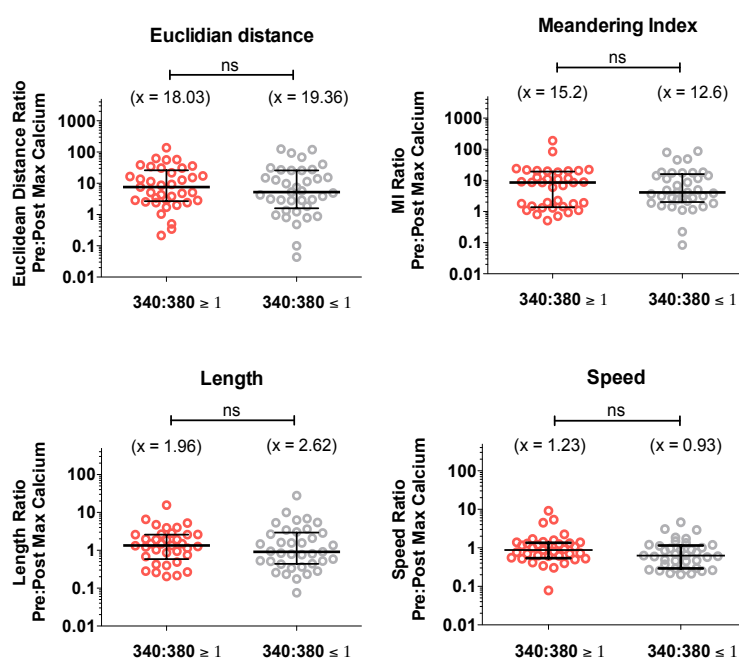



**Fig. S3: Correlative imaging analysis of signal productive MDM-CD4<sup>+</sup> T cell synapses.**

**A)** Following calcium live imaging, fixation and immunolabeling of samples removed T cells that are not strongly adhered to MDMs, increasing the incidence of MDM-CD4<sup>+</sup> T cell conjugates with high and low calcium profiles analyzed. **B)** Planar view of IS detected by confocal microscopy and showing the characteristic concentric and segregated organization of ICAM-1 and CD3 on opposite sides of the MDM-CD4<sup>+</sup> T cell interface, respectively; scale bar = 2  $\mu$ m.

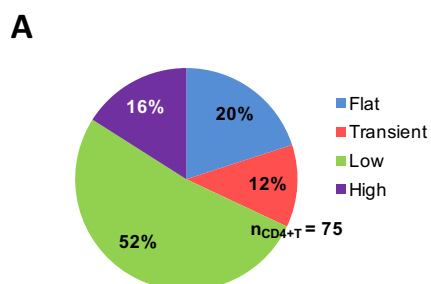

**B**

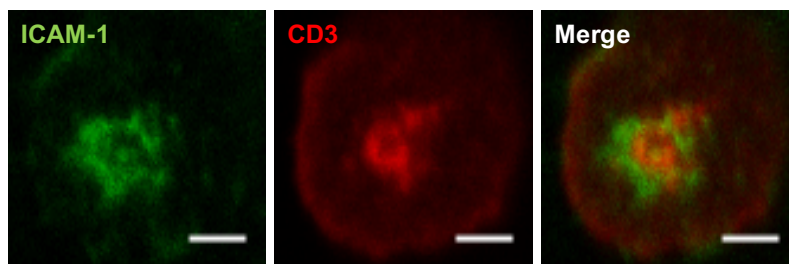

**Fig. S4: CCR5 expression on blood-isolated and PHA/IL-2 activated CD4<sup>+</sup> T cells.** Only a proportion of isolated CD4<sup>+</sup> T cells express CCR5 (Day 1), and CCR5 expression did not change with PHA/IL-2 treatment (Day 9), unlike what we previously described for total blood T cells (Fox et al. 2015, J. Leuk. Biol. 98: 59-71). Representative histograms for two specific anti-CCR5 monoclonal antibodies are shown overlaid on the relevant isotype control (shaded grey). The box plots show the percentage of CCR5 positive cells, statistical comparison was performed using a paired Student's t-test (ns= non-significant).

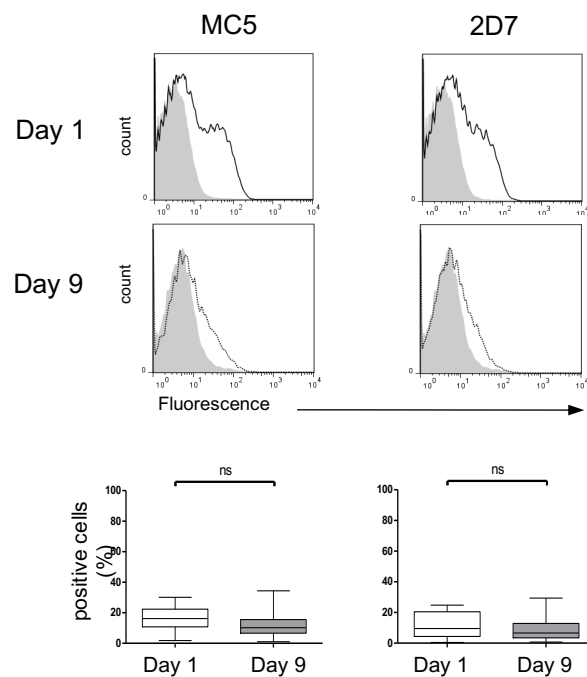

**Fig. S5: Colocalization of TGN or TfR with CCR5.** MDM-CD4<sup>+</sup> T cell conjugates were formed, fixed and immunolabeled for (a) TGN and CCR5 followed by anti-sheep IgGs-488 and GAM IgG2a-647 or (b) TfR and CCR5 followed by GAM-IgG1-488 and GAM-IgG2a-647 secondary antibodies according to the method detailed in main manuscript. Three examples of CCR5<sup>+</sup> conjugates formed  $\pm$  sAgs are shown, which are representative of z-stacks acquired from two or three donors. For each example, individual slices of the z-stack are shown over the region of CCR5 intracellular accumulation at the MDM-CD4<sup>+</sup> T cell interface. Within these slices the dotted box indicates the region where TGN or TfR and CCR5 are shown as separate greyscale images. Scale bar, 5  $\mu$ m.

**a**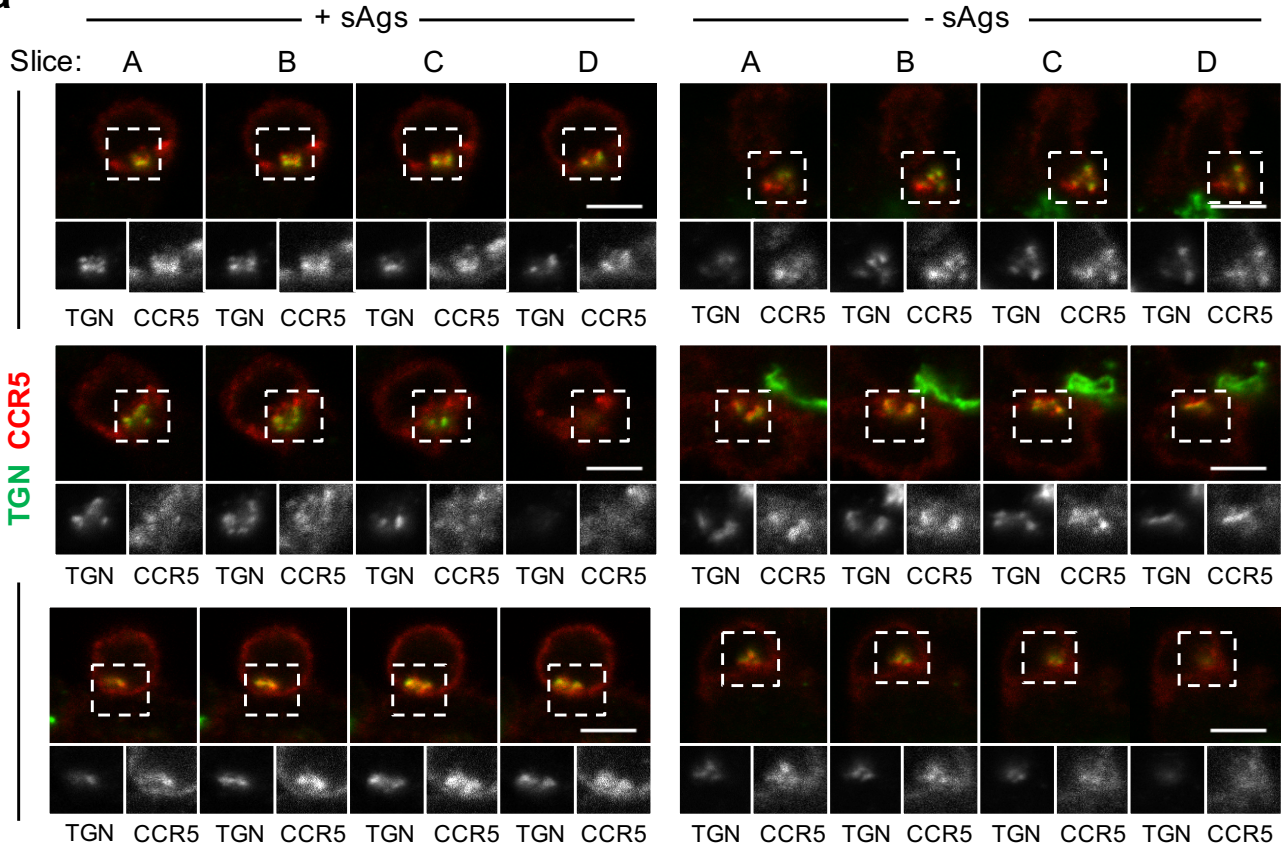**b**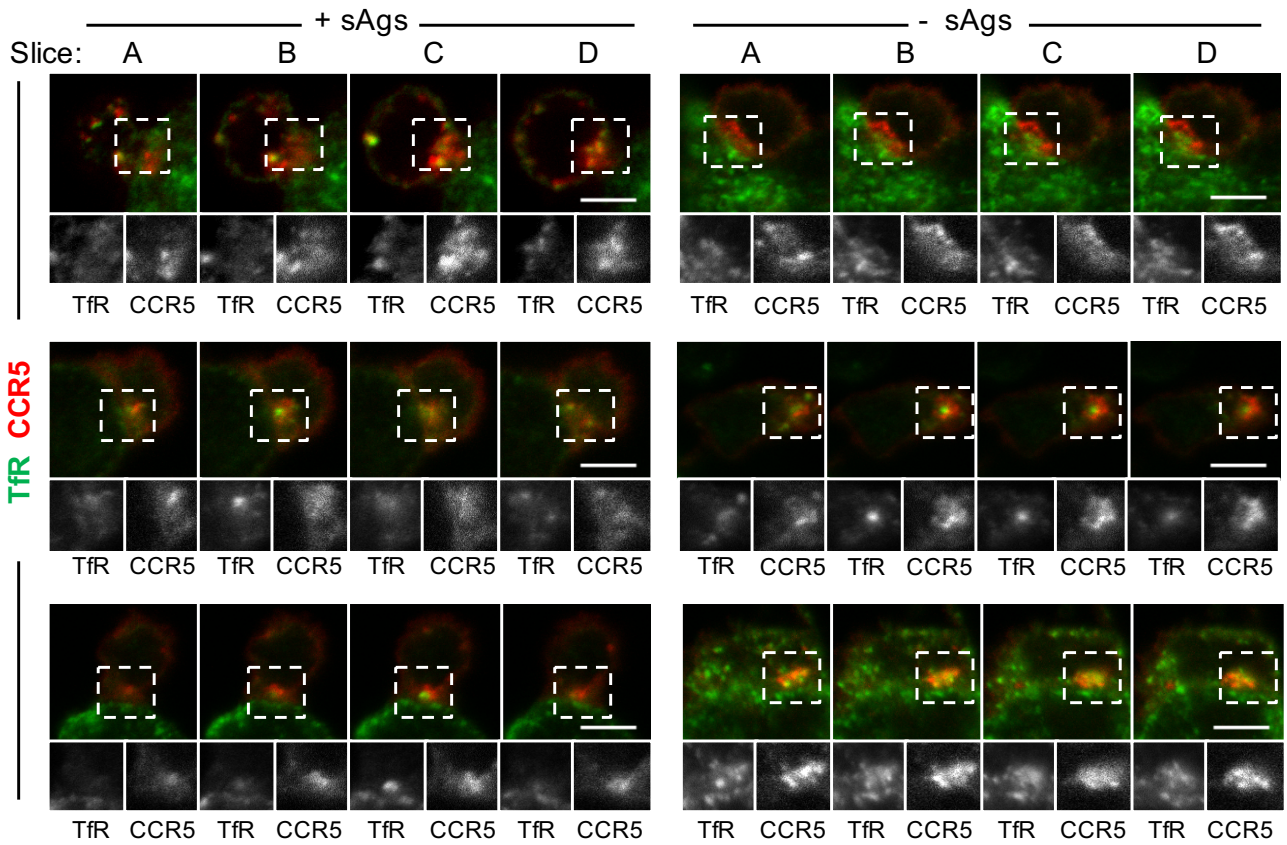

## **Movies legends:**

**Mov. 1:** Calcium response representative movies from Donor C

**Mov. 2:** Calcium response representative movies from Donor B

**Mov. 3:** Calcium response representative movies from Donor A

**Mov. 4:** Interplay between calcium flux and motility in individual CD4<sup>+</sup> cell – MDM interactions

**Mov. 5:** 3D bi-plot of first three principal components
